# Supplementary material for: Transcriptomic analysis links hepatocellular carcinoma (HCC) in HZE ion irradiated mice to a human HCC subtype with favorable outcomes
Source: PubMed Central journal article supplement (PMC8263559; doi:10.1038/s41598-021-93467-3), 2021-07-07
Supplement: 41598_2021_93467_MOESM8_ESM.pdf [file 41598_2021_93467_MOESM8_ESM.pdf]

Table S5. mrHCC Clusters vs TCGA Features

## Contents

|                                   |    |
|-----------------------------------|----|
| Molecular Subtyping . . . . .     | 1  |
| Clinical Data . . . . .           | 3  |
| Hepatitis Calls . . . . .         | 10 |
| Leukocyte Estimate . . . . .      | 10 |
| Purity/Ploidy . . . . .           | 10 |
| Historic Gene Signature . . . . . | 11 |
| TP53 / CTNNB1 / TERT . . . . .    | 12 |
| Pathology Review . . . . .        | 13 |
| mRNA Fusions . . . . .            | 16 |

Numbers in tables are percent of feature in each mrHCC cluster

### Molecular Subtyping

RPPA clusters (Rehan Akbani)

Chi-square test p-value: 2.917717e-06

Bonferroni adjusted p-value: 0.0002363351

|   | mrHCC1 | mrHCC2 | mrHCC3 |
|---|--------|--------|--------|
| 1 | 59.09  | 29.49  | 72.41  |
| 2 | 40.91  | 70.51  | 27.59  |

miRNA clusters (5 group NMF, Robertson group)

Chi-square test p-value: 2.606704e-07

Bonferroni adjusted p-value: 2.11143e-05

|      | mrHCC1 | mrHCC2 | mrHCC3 |
|------|--------|--------|--------|
| #N/A | 0.00   | 2.94   | 1.52   |
| 1    | 8.33   | 24.51  | 13.64  |
| 2    | 25.00  | 35.29  | 4.55   |
| 3    | 50.00  | 16.67  | 36.36  |
| 4    | 0.00   | 2.94   | 21.21  |
| 5    | 16.67  | 17.65  | 22.73  |

Hypermethylation Cluster (Laird group)

Chi-square test p-value: 1.224833e-09

Bonferroni adjusted p-value: 9.921146e-08

|   | mrHCC1 | mrHCC2 | mrHCC3 |
|---|--------|--------|--------|
| 1 | 20.83  | 4.90   | 27.27  |
| 2 | 25.00  | 47.06  | 34.85  |
| 3 | 33.33  | 3.92   | 27.27  |

4 20.83 44.12 10.61

Hypomethylation Cluster (Laird group)  
Chi-square test p-value: 0.0001523342  
Bonferroni adjusted p-value: 0.01233907

|   | mrHCC1 | mrHCC2 | mrHCC3 |
|---|--------|--------|--------|
| 1 | 41.67  | 20.59  | 46.97  |
| 2 | 41.67  | 33.33  | 36.36  |
| 3 | 16.67  | 46.08  | 16.67  |

mRNA clusters (5 group NMF, Hoadley group)  
Chi-square test p-value: 2.772859e-22  
Bonferroni adjusted p-value: 2.246016e-20

|   | mrHCC1 | mrHCC2 | mrHCC3 |
|---|--------|--------|--------|
| 1 | 34.78  | 2.97   | 75.76  |
| 2 | 13.04  | 0.99   | 1.52   |
| 3 | 21.74  | 21.78  | 9.09   |
| 4 | 8.70   | 49.50  | 1.52   |
| 5 | 21.74  | 24.75  | 12.12  |

DNA copy clusters, version 2 (Cherniak group)  
Chi-square test p-value: 0.0003038352  
Bonferroni adjusted p-value: 0.02461065

|   | mrHCC1 | mrHCC2 | mrHCC3 |
|---|--------|--------|--------|
| 1 | 36.36  | 30.69  | 18.75  |
| 2 | 18.18  | 39.60  | 48.44  |
| 3 | 45.45  | 13.86  | 29.69  |
| 4 | 0.00   | 15.84  | 3.12   |

CDKN2A silencing (Toshinori Hinoue)  
Chi-square test p-value: 0.1332147  
Bonferroni adjusted p-value: 1

|   | mrHCC1 | mrHCC2 | mrHCC3 |
|---|--------|--------|--------|
| 0 | 34.78  | 43.56  | 56.06  |
| 1 | 65.22  | 56.44  | 43.94  |

Paradigm clusters (k=4, Kiley Graim)  
Chi-square test p-value: 1.643718e-16  
Bonferroni adjusted p-value: 1.331412e-14

|             | mrHCC1 | mrHCC2 | mrHCC3 |
|-------------|--------|--------|--------|
| Paradigm:C1 | 9.09   | 34.00  | 12.50  |
| Paradigm:C2 | 27.27  | 23.00  | 20.31  |
| Paradigm:C3 | 13.64  | 6.00   | 65.62  |
| Paradigm:C4 | 50.00  | 37.00  | 1.56   |

iCluster clusters (k=3, Ronglai Shen)  
 Chi-square test p-value: 6.378108e-09  
 Bonferroni adjusted p-value: 5.166268e-07

|            | mrHCC1 | mrHCC2 | mrHCC3 |
|------------|--------|--------|--------|
| iCluster:1 | 54.55  | 13.40  | 61.90  |
| iCluster:2 | 18.18  | 42.27  | 15.87  |
| iCluster:3 | 27.27  | 44.33  | 22.22  |

## Clinical Data

Status

Chi-square test p-value: 0.1138658  
 Bonferroni adjusted p-value: 1

|       | mrHCC1 | mrHCC2 | mrHCC3 |
|-------|--------|--------|--------|
| Alive | 37.50  | 55.88  | 42.42  |
| Dead  | 62.50  | 44.12  | 57.58  |

time\_of\_follow-up

Kruskal-Wallis test p-value: 0.0466021  
 Bonferroni adjusted p-value: 1

race

Chi-square test p-value: 0.02298358  
 Bonferroni adjusted p-value: 1

|                                  | mrHCC1 | mrHCC2 | mrHCC3 |
|----------------------------------|--------|--------|--------|
| [Not Available]                  | 8.33   | 0.98   | 0.00   |
| [Not Evaluated]                  | 0.00   | 1.96   | 0.00   |
| [Unknown]                        | 4.17   | 1.96   | 0.00   |
| AMERICAN INDIAN OR ALASKA NATIVE | 0.00   | 0.98   | 1.52   |
| ASIAN                            | 37.50  | 18.63  | 40.91  |
| BLACK OR AFRICAN AMERICAN        | 4.17   | 7.84   | 7.58   |
| WHITE                            | 45.83  | 67.65  | 50.00  |

gender

Chi-square test p-value: 0.08767365  
 Bonferroni adjusted p-value: 1

|        | mrHCC1 | mrHCC2 | mrHCC3 |
|--------|--------|--------|--------|
| FEMALE | 33.33  | 27.45  | 43.94  |
| MALE   | 66.67  | 72.55  | 56.06  |

age\_at\_initial\_pathologic\_diagnosis

Kruskal-Wallis test p-value: 0.001087563  
 Bonferroni adjusted p-value: 0.08809258

neoplasm\_histologic\_grade

Chi-square test p-value: 0.0036417  
 Bonferroni adjusted p-value: 0.2949777

|                 | mrHCC1 | mrHCC2 | mrHCC3 |
|-----------------|--------|--------|--------|
| [Not Available] | 0.00   | 2.94   | 1.52   |
| G1              | 8.33   | 26.47  | 7.58   |
| G2              | 58.33  | 49.02  | 43.94  |
| G3              | 33.33  | 21.57  | 46.97  |

residual\_tumor

Chi-square test p-value: 0.2111647

Bonferroni adjusted p-value: 1

|                 | mrHCC1 | mrHCC2 | mrHCC3 |
|-----------------|--------|--------|--------|
| [Not Available] | 4.17   | 4.90   | 1.52   |
| R0              | 79.17  | 84.31  | 80.30  |
| R1              | 8.33   | 3.92   | 7.58   |
| R2              | 4.17   | 0.00   | 0.00   |
| RX              | 4.17   | 6.86   | 10.61  |

pathologic\_T

Chi-square test p-value: 0.2902317

Bonferroni adjusted p-value: 1

|                 | mrHCC1 | mrHCC2 | mrHCC3 |
|-----------------|--------|--------|--------|
| [Not Available] | 0.00   | 0.98   | 0.00   |
| T1              | 29.17  | 49.02  | 28.79  |
| T2              | 29.17  | 19.61  | 31.82  |
| T3              | 16.67  | 13.73  | 24.24  |
| T3a             | 8.33   | 8.82   | 7.58   |
| T3b             | 8.33   | 0.98   | 3.03   |
| T4              | 8.33   | 5.88   | 4.55   |
| TX              | 0.00   | 0.98   | 0.00   |

pathologic\_N

Chi-square test p-value: 0.1504892

Bonferroni adjusted p-value: 1

|                 | mrHCC1 | mrHCC2 | mrHCC3 |
|-----------------|--------|--------|--------|
| [Not Available] | 0.00   | 0.00   | 1.52   |
| N0              | 58.33  | 62.75  | 66.67  |
| N1              | 0.00   | 0.00   | 4.55   |
| NX              | 41.67  | 37.25  | 27.27  |

pathologic\_M

Chi-square test p-value: 0.04168974

Bonferroni adjusted p-value: 1

|    | mrHCC1 | mrHCC2 | mrHCC3 |
|----|--------|--------|--------|
| M0 | 79.17  | 67.65  | 78.79  |
| M1 | 8.33   | 0.98   | 1.52   |
| MX | 12.50  | 31.37  | 19.70  |

pathologic\_stage

Chi-square test p-value: 0.2454572

Bonferroni adjusted p-value: 1

|                 | mrHCC1 | mrHCC2 | mrHCC3 |
|-----------------|--------|--------|--------|
| [Not Available] | 0.00   | 7.84   | 6.06   |
| Stage I         | 29.17  | 48.04  | 25.76  |
| Stage II        | 29.17  | 17.65  | 27.27  |
| Stage III       | 0.00   | 1.96   | 1.52   |
| Stage IIIA      | 25.00  | 19.61  | 27.27  |
| Stage IIIB      | 4.17   | 1.96   | 4.55   |
| Stage IIIC      | 4.17   | 1.96   | 4.55   |
| Stage IV        | 4.17   | 0.00   | 1.52   |
| Stage IVA       | 0.00   | 0.00   | 1.52   |
| Stage IVB       | 4.17   | 0.98   | 0.00   |

Age>65

Chi-square test p-value: 0.02702547

Bonferroni adjusted p-value: 1

|     | mrHCC1 | mrHCC2 | mrHCC3 |
|-----|--------|--------|--------|
| No  | 58.33  | 51.96  | 72.73  |
| Yes | 41.67  | 48.04  | 27.27  |

BMI

Kruskal-Wallis test p-value: 0.05395187

Bonferroni adjusted p-value: 1

ObesityClass1

Chi-square test p-value: 0.09237375

Bonferroni adjusted p-value: 1

|            | mrHCC1 | mrHCC2 | mrHCC3 |
|------------|--------|--------|--------|
| ---        | 4.17   | 12.75  | 16.67  |
| #N/A       | 0.00   | 0.98   | 4.55   |
| Normal     | 62.50  | 36.27  | 46.97  |
| Obese      | 8.33   | 23.53  | 16.67  |
| Overweight | 25.00  | 26.47  | 15.15  |

ObesityClass2

Chi-square test p-value: 0.1322106

Bonferroni adjusted p-value: 1

|        | mrHCC1 | mrHCC2 | mrHCC3 |
|--------|--------|--------|--------|
| ---    | 4.17   | 12.75  | 16.67  |
| #N/A   | 0.00   | 0.98   | 4.55   |
| Normal | 87.50  | 62.75  | 62.12  |
| Obese  | 8.33   | 23.53  | 16.67  |

Asian Race

Chi-square test p-value: 0.001486905

Bonferroni adjusted p-value: 0.1204393

|           | mrHCC1 | mrHCC2 | mrHCC3 |
|-----------|--------|--------|--------|
| 0         | 12.50  | 4.90   | 0.00   |
| Asian     | 37.50  | 18.63  | 40.91  |
| Not Asian | 50.00  | 76.47  | 59.09  |

Caucasian

Chi-square test p-value: 0.003826918

Bonferroni adjusted p-value: 0.3099803

|               | mrHCC1 | mrHCC2 | mrHCC3 |
|---------------|--------|--------|--------|
| 0             | 12.50  | 4.90   | 0.00   |
| Caucasian     | 45.83  | 67.65  | 50.00  |
| Not Caucasian | 41.67  | 27.45  | 50.00  |

person\_neoplasm\_cancer\_status

Chi-square test p-value: 0.6419603

Bonferroni adjusted p-value: 1

|                 | mrHCC1 | mrHCC2 | mrHCC3 |
|-----------------|--------|--------|--------|
| [Not Available] | 8.33   | 2.94   | 4.55   |
| [Unknown]       | 0.00   | 2.94   | 6.06   |
| TUMOR FREE      | 66.67  | 65.69  | 57.58  |
| WITH TUMOR      | 25.00  | 28.43  | 31.82  |

relative\_family\_cancer\_history\_ind\_3

Chi-square test p-value: 0.414096

Bonferroni adjusted p-value: 1

|                 | mrHCC1 | mrHCC2 | mrHCC3 |
|-----------------|--------|--------|--------|
| [Not Available] | 4.17   | 3.92   | 6.06   |
| [Unknown]       | 8.33   | 15.69  | 9.09   |
| NO              | 54.17  | 40.20  | 56.06  |
| YES             | 33.33  | 40.20  | 28.79  |

Family History

Chi-square test p-value: 0.3180356

Bonferroni adjusted p-value: 1

|     | mrHCC1 | mrHCC2 | mrHCC3 |
|-----|--------|--------|--------|
| --- | 12.50  | 19.61  | 15.15  |
| No  | 54.17  | 40.20  | 56.06  |
| Yes | 33.33  | 40.20  | 28.79  |

history\_hepato\_carcinoma\_risk\_factor

Chi-square test p-value: 0.5731797

Bonferroni adjusted p-value: 1

|                                                             | mrHCC1 | mrHCC2 |
|-------------------------------------------------------------|--------|--------|
| [Not Available]                                             | 0.00   | 0.98   |
| [Unknown]                                                   | 0.00   | 0.00   |
| Alcohol consumption                                         | 25.00  | 25.49  |
| Alcohol consumption Hepatitis B                             | 0.00   | 0.98   |
| Alcohol consumption Hepatitis B Hepatitis C                 | 0.00   | 0.98   |
| Alcohol consumption Hepatitis B Hepatitis C Hemochromatosis | 0.00   | 0.98   |
| Alcohol consumption Hepatitis C                             | 0.00   | 4.90   |
| Alcohol consumption Non-Alcoholic Fatty Liver Disease       | 0.00   | 2.94   |
| Alcohol consumption Other                                   | 4.17   | 0.98   |
| Alpha-1 Antitrypsin Deficiency Other                        | 0.00   | 0.98   |
| Hemochromatosis                                             | 0.00   | 0.00   |
| Hepatitis B                                                 | 12.50  | 7.84   |
| Hepatitis B Hepatitis C                                     | 0.00   | 0.98   |
| Hepatitis B Other                                           | 0.00   | 0.00   |
| Hepatitis C                                                 | 8.33   | 15.69  |
| Hepatitis C Other                                           | 0.00   | 0.00   |
| No History of Primary Risk Factors                          | 41.67  | 24.51  |
| Non-Alcoholic Fatty Liver Disease                           | 4.17   | 3.92   |
| Non-Alcoholic Fatty Liver Disease Other                     | 0.00   | 0.98   |
| Other                                                       | 4.17   | 6.86   |

|                                                             | mrHCC3 |
|-------------------------------------------------------------|--------|
| [Not Available]                                             | 7.58   |
| [Unknown]                                                   | 3.03   |
| Alcohol consumption                                         | 22.73  |
| Alcohol consumption Hepatitis B                             | 0.00   |
| Alcohol consumption Hepatitis B Hepatitis C                 | 0.00   |
| Alcohol consumption Hepatitis B Hepatitis C Hemochromatosis | 0.00   |
| Alcohol consumption Hepatitis C                             | 3.03   |
| Alcohol consumption Non-Alcoholic Fatty Liver Disease       | 0.00   |
| Alcohol consumption Other                                   | 1.52   |
| Alpha-1 Antitrypsin Deficiency Other                        | 0.00   |
| Hemochromatosis                                             | 3.03   |
| Hepatitis B                                                 | 10.61  |
| Hepatitis B Hepatitis C                                     | 0.00   |
| Hepatitis B Other                                           | 1.52   |
| Hepatitis C                                                 | 9.09   |
| Hepatitis C Other                                           | 1.52   |
| No History of Primary Risk Factors                          | 31.82  |
| Non-Alcoholic Fatty Liver Disease                           | 3.03   |
| Non-Alcoholic Fatty Liver Disease Other                     | 0.00   |
| Other                                                       | 1.52   |

Alcoholic liver disease

Chi-square test p-value: 0.02611458

Bonferroni adjusted p-value: 1

|         | mrHCC1 | mrHCC2 | mrHCC3 |
|---------|--------|--------|--------|
| ---     | 4.17   | 0.98   | 12.12  |
| Alcohol | 29.17  | 37.25  | 27.27  |
| No      | 66.67  | 61.76  | 60.61  |

Hepatitis C

Chi-square test p-value: 0.008433487

Bonferroni adjusted p-value: 0.6831124

|             | mrHCC1 | mrHCC2 | mrHCC3 |
|-------------|--------|--------|--------|
| ---         | 4.17   | 0.98   | 12.12  |
| Hepatitis C | 8.33   | 23.53  | 13.64  |
| No          | 87.50  | 75.49  | 74.24  |

Hepatitis B

Chi-square test p-value: 0.03630778

Bonferroni adjusted p-value: 1

|             | mrHCC1 | mrHCC2 | mrHCC3 |
|-------------|--------|--------|--------|
| ---         | 4.17   | 0.98   | 12.12  |
| Hepatitis B | 12.50  | 11.76  | 12.12  |
| No          | 83.33  | 87.25  | 75.76  |

NAFLD

Chi-square test p-value: 0.0174004

Bonferroni adjusted p-value: 1

|       | mrHCC1 | mrHCC2 | mrHCC3 |
|-------|--------|--------|--------|
| ---   | 0.00   | 0.98   | 10.61  |
| NAFLD | 4.17   | 7.84   | 3.03   |
| No    | 95.83  | 91.18  | 86.36  |

Type of macrovascular invasion

Chi-square test p-value: 0.03532173

Bonferroni adjusted p-value: 1

|                        | mrHCC1 | mrHCC2 | mrHCC3 |
|------------------------|--------|--------|--------|
| ---                    | 16.67  | 14.71  | 22.73  |
| Macrovascular Invasion | 8.33   | 0.00   | 9.09   |
| Microvascular          | 29.17  | 22.55  | 22.73  |
| None                   | 45.83  | 62.75  | 45.45  |

Vascular Invasion

Chi-square test p-value: 0.1794046

Bonferroni adjusted p-value: 1

|     | mrHCC1 | mrHCC2 | mrHCC3 |
|-----|--------|--------|--------|
| --- | 16.67  | 14.71  | 22.73  |
| No  | 45.83  | 62.75  | 45.45  |
| Yes | 37.50  | 22.55  | 31.82  |

child\_pugh\_classification\_grade

Chi-square test p-value: 0.0340016



Bonferroni adjusted p-value: 1

|                 | mrHCC1 | mrHCC2 | mrHCC3 |
|-----------------|--------|--------|--------|
| [Not Available] | 8.33   | 17.65  | 31.82  |
| [Unknown]       | 20.83  | 21.57  | 28.79  |
| A               | 62.50  | 51.96  | 28.79  |
| B               | 8.33   | 8.82   | 10.61  |

alpha\_fetoprotien\_at\_procurement

Kruskal-Wallis test p-value: 0.3052903

Bonferroni adjusted p-value: 1

AFP>300

Chi-square test p-value: 0.0003467845

Bonferroni adjusted p-value: 0.02808955

|     | mrHCC1 | mrHCC2 | mrHCC3 |
|-----|--------|--------|--------|
|     | 0.00   | 0.00   | 0.00   |
| No  | 63.16  | 90.54  | 60.98  |
| Yes | 36.84  | 9.46   | 39.02  |

liver\_fibrosis\_ishak\_score\_category

Chi-square test p-value: 0.02579391

Bonferroni adjusted p-value: 1

|                                                | mrHCC1 | mrHCC2 | mrHCC3 |
|------------------------------------------------|--------|--------|--------|
| [Not Available]                                | 16.67  | 13.73  | 36.36  |
| [Unknown]                                      | 4.17   | 0.98   | 0.00   |
| 0 - No Fibrosis                                | 54.17  | 37.25  | 28.79  |
| 1,2 - Portal Fibrosis                          | 8.33   | 13.73  | 7.58   |
| 3,4 - Fibrous Speta                            | 8.33   | 5.88   | 9.09   |
| 5 - Nodular Formation and Incomplete Cirrhosis | 0.00   | 1.96   | 3.03   |
| 6 - Established Cirrhosis                      | 8.33   | 26.47  | 15.15  |

Cirrhosis

Chi-square test p-value: 0.1126564

Bonferroni adjusted p-value: 1

|     | mrHCC1 | mrHCC2 | mrHCC3 |
|-----|--------|--------|--------|
| --- | 8.33   | 2.94   | 1.52   |
| No  | 83.33  | 67.65  | 77.27  |
| Yes | 8.33   | 29.41  | 21.21  |

new\_tumor\_event\_after\_initial\_treatment

Chi-square test p-value: 0.1053778

Bonferroni adjusted p-value: 1

|                 | mrHCC1 | mrHCC2 | mrHCC3 |
|-----------------|--------|--------|--------|
| [Not Available] | 62.50  | 32.35  | 37.88  |
| [Unknown]       | 0.00   | 0.98   | 6.06   |
| NO              | 20.83  | 31.37  | 28.79  |
| Yes             | 0.00   | 0.98   | 0.00   |

YES 16.67 34.31 27.27

## Hepatitis Calls

HBV\_consensus

Chi-square test p-value: 0.1571745

Bonferroni adjusted p-value: 1

|     | mrHCC1 | mrHCC2 | mrHCC3 |
|-----|--------|--------|--------|
| neg | 75.00  | 82.35  | 69.70  |
| pos | 25.00  | 17.65  | 30.30  |

HCV\_consensus

Chi-square test p-value: 0.1089897

Bonferroni adjusted p-value: 1

|     | mrHCC1 | mrHCC2 | mrHCC3 |
|-----|--------|--------|--------|
| neg | 91.67  | 76.47  | 86.36  |
| pos | 8.33   | 23.53  | 13.64  |

## Leukocyte Estimate

Leukocyte\_estimate

Kruskal-Wallis test p-value: 0.004087824

Bonferroni adjusted p-value: 0.3311137

## Purity/Ploidy

Purity

Kruskal-Wallis test p-value: 0.0003424982

Bonferroni adjusted p-value: 0.02774235

Ploidy

Kruskal-Wallis test p-value: 0.0005763198

Bonferroni adjusted p-value: 0.04668191

Genome\_Doublings

Chi-square test p-value: 1.528364e-05

Bonferroni adjusted p-value: 0.001237975

|   | mrHCC1 | mrHCC2 | mrHCC3 |
|---|--------|--------|--------|
| 0 | 42.86  | 76.60  | 43.55  |
| 1 | 19.05  | 18.09  | 33.87  |
| 2 | 38.10  | 5.32   | 22.58  |

Cancer\_DNA\_fraction

Kruskal-Wallis test p-value: 0.02205458

Bonferroni adjusted p-value: 1

## Historic Gene Signature

### NCIP

Chi-square test p-value: 8.17942e-19

Bonferroni adjusted p-value: 6.62533e-17

|   | mrHCC1 | mrHCC2 | mrHCC3 |
|---|--------|--------|--------|
| A | 54.17  | 5.88   | 72.73  |
| B | 45.83  | 94.12  | 27.27  |

### NCIHS

Chi-square test p-value: 5.895402e-07

Bonferroni adjusted p-value: 4.775276e-05

|    | mrHCC1 | mrHCC2 | mrHCC3 |
|----|--------|--------|--------|
| HC | 91.67  | 96.08  | 66.67  |
| HS | 8.33   | 3.92   | 33.33  |

### NCIPHS

Chi-square test p-value: 1.893813e-18

Bonferroni adjusted p-value: 1.533989e-16

|    | mrHCC1 | mrHCC2 | mrHCC3 |
|----|--------|--------|--------|
| A  | 47.83  | 4.95   | 37.88  |
| B  | 43.48  | 83.17  | 13.64  |
| HS | 8.70   | 11.88  | 48.48  |

### SNUR

Chi-square test p-value: 2.846825e-12

Bonferroni adjusted p-value: 2.305928e-10

|      | mrHCC1 | mrHCC2 | mrHCC3 |
|------|--------|--------|--------|
| High | 33.33  | 15.69  | 71.21  |
| Low  | 66.67  | 84.31  | 28.79  |

### HB16

Chi-square test p-value: 4.474791e-19

Bonferroni adjusted p-value: 3.624581e-17

|    | mrHCC1 | mrHCC2 | mrHCC3 |
|----|--------|--------|--------|
| C1 | 62.50  | 92.16  | 22.73  |
| C2 | 37.50  | 7.84   | 77.27  |

### RS65

Chi-square test p-value: 2.368049e-15

Bonferroni adjusted p-value: 1.91812e-13

|      | mrHCC1 | mrHCC2 | mrHCC3 |
|------|--------|--------|--------|
| high | 41.67  | 6.86   | 66.67  |

low 58.33 93.14 33.33

RS65.Score

Kruskal-Wallis test p-value: 1.187344e-20

Bonferroni adjusted p-value: 9.617487e-19

Hoshida

Chi-square test p-value: 1.384376e-21

Bonferroni adjusted p-value: 1.121345e-19

|   | mrHCC1 | mrHCC2 | mrHCC3 |
|---|--------|--------|--------|
| 1 | 20.83  | 16.67  | 9.09   |
| 2 | 70.83  | 11.76  | 84.85  |
| 3 | 8.33   | 71.57  | 6.06   |

HIPPO

Chi-square test p-value: 1.585921e-06

Bonferroni adjusted p-value: 0.0001284596

|     | mrHCC1 | mrHCC2 | mrHCC3 |
|-----|--------|--------|--------|
| AH  | 66.67  | 91.18  | 57.58  |
| SOH | 33.33  | 8.82   | 42.42  |

CC-like

Chi-square test p-value: 4.450136e-18

Bonferroni adjusted p-value: 3.60461e-16

|     | mrHCC1 | mrHCC2 | mrHCC3 |
|-----|--------|--------|--------|
| CCL | 33.33  | 2.94   | 66.67  |
| HCC | 66.67  | 97.06  | 33.33  |

IDH

Chi-square test p-value: 0.0981672

Bonferroni adjusted p-value: 1

|            | mrHCC1 | mrHCC2 | mrHCC3 |
|------------|--------|--------|--------|
| IDH mutant | 4.17   | 0.00   | 4.55   |
| WT         | 95.83  | 100.00 | 95.45  |

IDH\_P

Kruskal-Wallis test p-value: 1.309825e-08

Bonferroni adjusted p-value: 1.060958e-06

## TP53 / CTNNB1 / TERT

TP53\_mutation

Chi-square test p-value: 0.01301742

Bonferroni adjusted p-value: 1

|     | mrHCC1 | mrHCC2 | mrHCC3 |
|-----|--------|--------|--------|
| mut | 26.09  | 23.23  | 44.62  |
| wt  | 73.91  | 76.77  | 55.38  |

TP53 mutation signature (sum of expression of targets)  
 Kruskal-Wallis test p-value: 1.032032e-10  
 Bonferroni adjusted p-value: 8.359459e-09

CTNNB1\_mutation  
 Chi-square test p-value: 0.006422675  
 Bonferroni adjusted p-value: 0.5202367

|     | mrHCC1 | mrHCC2 | mrHCC3 |
|-----|--------|--------|--------|
| mut | 30.43  | 34.34  | 12.31  |
| wt  | 69.57  | 65.66  | 87.69  |

TERT promoter mutation  
 Chi-square test p-value: 0.2431761  
 Bonferroni adjusted p-value: 1

|              | mrHCC1 | mrHCC2 | mrHCC3 |
|--------------|--------|--------|--------|
| mut          | 41.67  | 50.98  | 34.85  |
| no           | 54.17  | 48.04  | 63.64  |
| not assessed | 4.17   | 0.98   | 1.52   |

TERT mRNA expression  
 Kruskal-Wallis test p-value: 0.4653658  
 Bonferroni adjusted p-value: 1

## Pathology Review

HCC subtypes  
 Chi-square test p-value: 0.005754126  
 Bonferroni adjusted p-value: 0.4660842

|                                          | mrHCC1 | mrHCC2 | mrHCC3 |
|------------------------------------------|--------|--------|--------|
| Cirrhotosimetic hepatocellular carcinoma | 5.00   | 0.00   | 3.12   |
| Clear cell hepatocellular carcinoma      | 0.00   | 8.42   | 4.69   |
| Fibrolamellar carcinoma                  | 0.00   | 0.00   | 6.25   |
| Lymphocyte rich hepatocellular carcinoma | 0.00   | 0.00   | 4.69   |
| Myxoid hepatocellular carcinoma          | 0.00   | 1.05   | 0.00   |
| No specific subtype                      | 80.00  | 82.11  | 67.19  |
| Sarcomatoid hepatocellular carcinoma     | 0.00   | 0.00   | 3.12   |
| Scirrhous hepatocellular carcinoma       | 15.00  | 1.05   | 6.25   |
| Steatohepatitic                          | 0.00   | 7.37   | 4.69   |

Grade-predominant  
 Chi-square test p-value: 0.0008726526  
 Bonferroni adjusted p-value: 0.07068486

|   | mrHCC1 | mrHCC2 | mrHCC3 |
|---|--------|--------|--------|
| 1 | 0.00   | 4.21   | 0.00   |
| 2 | 10.00  | 35.79  | 10.94  |
| 3 | 75.00  | 49.47  | 64.06  |
| 4 | 15.00  | 10.53  | 25.00  |

Grade-worst

Chi-square test p-value: 0.00263232

Bonferroni adjusted p-value: 0.2132179

|   | mrHCC1 | mrHCC2 | mrHCC3 |
|---|--------|--------|--------|
| 1 | 0.00   | 2.11   | 0.00   |
| 2 | 5.00   | 23.16  | 4.69   |
| 3 | 65.00  | 53.68  | 50.00  |
| 4 | 30.00  | 21.05  | 45.31  |

Clear Cell Change

Kruskal-Wallis test p-value: 0.8620273

Bonferroni adjusted p-value: 1

Intratumoral hyaline bodies

Kruskal-Wallis test p-value: 0.4482744

Bonferroni adjusted p-value: 1

Intratumoral Mallory hyaline bodies

Kruskal-Wallis test p-value: 0.1408251

Bonferroni adjusted p-value: 1

Macrovesicular steatosis

Kruskal-Wallis test p-value: 0.3084989

Bonferroni adjusted p-value: 1

Ballooned tumor cells

Chi-square test p-value: 0.2824133

Bonferroni adjusted p-value: 1

|          | mrHCC1 | mrHCC2 | mrHCC3 |
|----------|--------|--------|--------|
| No       | 85.00  | 75.79  | 82.81  |
| Yes Few  | 10.00  | 11.58  | 14.06  |
| Yes Many | 5.00   | 12.63  | 3.12   |

Intratumoral inflammation

Chi-square test p-value: 0.29864

Bonferroni adjusted p-value: 1

|                                                                          | mrHCC1 |
|--------------------------------------------------------------------------|--------|
| None or minimal                                                          | 80.00  |
| Yes, lymphocytic Marked (on average, more inflammatory cells than tumor) | 0.00   |
| Yes, lymphocytic Mild                                                    | 15.00  |
| Yes, lymphocytic Moderate                                                | 5.00   |
| Yes, neutrophilic Mild                                                   | 0.00   |
|                                                                          | mrHCC2 |
| None or minimal                                                          | 84.21  |
| Yes, lymphocytic Marked (on average, more inflammatory cells than tumor) | 0.00   |
| Yes, lymphocytic Mild                                                    | 14.74  |

|                           |      |
|---------------------------|------|
| Yes, lymphocytic Moderate | 1.05 |
| Yes, neutrophilic Mild    | 0.00 |

|                                                                          |        |
|--------------------------------------------------------------------------|--------|
|                                                                          | mrHCC3 |
| None or minimal                                                          | 71.88  |
| Yes, lymphocytic Marked (on average, more inflammatory cells than tumor) | 3.12   |
| Yes, lymphocytic Mild                                                    | 17.19  |
| Yes, lymphocytic Moderate                                                | 6.25   |
| Yes, neutrophilic Mild                                                   | 1.56   |

Cholestasis

Chi-square test p-value: 0.5459086

Bonferroni adjusted p-value: 1

|                                       |        |        |        |
|---------------------------------------|--------|--------|--------|
|                                       | mrHCC1 | mrHCC2 | mrHCC3 |
| No                                    | 65.00  | 70.53  | 79.69  |
| Yes Mild (less than 5% of tumor area) | 25.00  | 24.21  | 17.19  |
| Yes Moderate (6-50% of tumor area)    | 10.00  | 5.26   | 3.12   |

Intratatumoral fibrosis

Chi-square test p-value: 0.04370329

Bonferroni adjusted p-value: 1

|                                                                             |        |
|-----------------------------------------------------------------------------|--------|
|                                                                             | mrHCC1 |
| None or minimal                                                             | 70.00  |
| Yes Marked (fibrosis is equal to or greater than the amount of tumor cells) | 5.00   |
| Yes Mild (intratumoral fibrosis less than 5-25% of surface area)            | 10.00  |
| Yes Moderate (intratumoral fibrosis 26- 49% of surface area)                | 15.00  |

|                                                                             |        |
|-----------------------------------------------------------------------------|--------|
|                                                                             | mrHCC2 |
| None or minimal                                                             | 84.21  |
| Yes Marked (fibrosis is equal to or greater than the amount of tumor cells) | 0.00   |
| Yes Mild (intratumoral fibrosis less than 5-25% of surface area)            | 12.63  |
| Yes Moderate (intratumoral fibrosis 26- 49% of surface area)                | 3.16   |

|                                                                             |        |
|-----------------------------------------------------------------------------|--------|
|                                                                             | mrHCC3 |
| None or minimal                                                             | 67.19  |
| Yes Marked (fibrosis is equal to or greater than the amount of tumor cells) | 1.56   |
| Yes Mild (intratumoral fibrosis less than 5-25% of surface area)            | 23.44  |
| Yes Moderate (intratumoral fibrosis 26- 49% of surface area)                | 7.81   |

Growth pattern-major

Chi-square test p-value: 0.0001915865

Bonferroni adjusted p-value: 0.0155185

|                 |        |        |        |
|-----------------|--------|--------|--------|
|                 | mrHCC1 | mrHCC2 | mrHCC3 |
| Macrotrabecular | 40.00  | 3.16   | 10.94  |
| Pseudoacinar    | 10.00  | 9.47   | 6.25   |
| Solid           | 20.00  | 44.21  | 45.31  |
| Trabecular      | 30.00  | 43.16  | 37.50  |

Growth pattern-other

Chi-square test p-value: 0.3760001

Bonferroni adjusted p-value: 1

|                                         | mrHCC1 | mrHCC2 | mrHCC3 |
|-----------------------------------------|--------|--------|--------|
| Macrotrabecular                         | 0.00   | 1.05   | 1.56   |
| Macrotrabecular Solid                   | 0.00   | 0.00   | 3.12   |
| Macrotrabecular Trabecular              | 0.00   | 0.00   | 1.56   |
| NULL                                    | 5.00   | 13.68  | 14.06  |
| Pseudoacinar                            | 5.00   | 7.37   | 1.56   |
| Pseudoacinar Macrotrabecular            | 0.00   | 2.11   | 1.56   |
| Pseudoacinar Macrotrabecular Solid      | 0.00   | 0.00   | 1.56   |
| Pseudoacinar Solid                      | 5.00   | 1.05   | 4.69   |
| Pseudoacinar Solid Macrotrabecular      | 0.00   | 1.05   | 0.00   |
| Pseudoacinar Trabecular                 | 10.00  | 8.42   | 6.25   |
| Pseudoacinar Trabecular Macrotrabecular | 0.00   | 0.00   | 3.12   |
| Solid                                   | 15.00  | 16.84  | 12.50  |
| Solid Macrotrabecular                   | 0.00   | 3.16   | 4.69   |
| Solid Macrotrabecular Pseudoacinar      | 0.00   | 3.16   | 0.00   |
| Solid Pseudoacinar                      | 5.00   | 7.37   | 6.25   |
| Solid Pseudoacinar Trabecular           | 0.00   | 0.00   | 0.00   |
| Solid Trabecular                        | 10.00  | 3.16   | 4.69   |
| Solid Trabecular Pseudoacinar           | 5.00   | 0.00   | 1.56   |
| Trabecular                              | 10.00  | 21.05  | 17.19  |
| Trabecular Macrotrabecular              | 5.00   | 1.05   | 7.81   |
| Trabecular Macrotrabecular Pseudoacinar | 0.00   | 1.05   | 0.00   |
| Trabecular Pseudoacinar                 | 10.00  | 5.26   | 0.00   |
| Trabecular Solid                        | 15.00  | 3.16   | 6.25   |

Multimorphologies

Chi-square test p-value: 0.682271

Bonferroni adjusted p-value: 1

|                                                                             | mrHCC1 |
|-----------------------------------------------------------------------------|--------|
| No                                                                          | 95.00  |
| Yes - Clearly distinct nodules of HCC with different morphological patterns | 5.00   |
|                                                                             | mrHCC2 |
| No                                                                          | 88.42  |
| Yes - Clearly distinct nodules of HCC with different morphological patterns | 11.58  |
|                                                                             | mrHCC3 |
| No                                                                          | 89.06  |
| Yes - Clearly distinct nodules of HCC with different morphological patterns | 10.94  |

mRNA Fusions

mRNA fusions

Chi-square test p-value: 0.5036021

Bonferroni adjusted p-value: 1



|                                   | mrHCC1 | mrHCC2 | mrHCC3 |
|-----------------------------------|--------|--------|--------|
| ---                               | 95.83  | 89.22  | 83.33  |
| ARID1A-PRKCZ                      | 0.00   | 0.98   | 0.00   |
| CTSC-RAB38                        | 0.00   | 0.00   | 3.03   |
| DNAJB1/PRKACA                     | 0.00   | 0.00   | 6.06   |
| FGFR2-BICC1                       | 0.00   | 0.00   | 1.52   |
| LOC283587-TERT                    | 0.00   | 0.98   | 0.00   |
| PSPC-FGF14                        | 4.17   | 0.00   | 0.00   |
| PTK2-DENND3                       | 0.00   | 0.98   | 0.00   |
| SLC12A7-TERT                      | 0.00   | 0.98   | 1.52   |
| SLC7A2-TERT                       | 0.00   | 0.98   | 0.00   |
| STK38-TDRD7                       | 0.00   | 0.98   | 0.00   |
| STRN3-MAML3                       | 0.00   | 0.00   | 1.52   |
| TACC3-FGFR3; TCF7L2-RP11-202P11.1 | 0.00   | 0.98   | 0.00   |
| TCF7L2-VTI1A                      | 0.00   | 0.98   | 0.00   |
| TCF7L2-VTI1A; EP300-RBX1          | 0.00   | 0.98   | 0.00   |
| TFG-GPR128                        | 0.00   | 0.00   | 1.52   |
| XRCC5-ABCB4; RAD50-C5orf56        | 0.00   | 0.98   | 0.00   |
| XRCC6-ACO2                        | 0.00   | 0.98   | 1.52   |
